# Supplementary material for: Facile Synthesis of Sulfur-Containing Functionalized Disiloxanes with Nonconventional Fluorescence by Thiol–Epoxy Click Reaction
Source: MDPI journal article supplement (doi:10.3390/ijms24097785), 2023-04-24
Supplement: s1 [file s1]

## Supporting Information

# Facile Synthesis of Sulfur-Containing Functionalized Disiloxanes with Nonconventional Fluorescence by Thiol–Epoxy Click Reaction

Jing Tang <sup>1,2</sup>, Shengyu Feng <sup>2</sup> and Dengxu Wang <sup>1,2,\*</sup>

<sup>1</sup> Institute of Novel Semiconductors, State Key Laboratory of Crystal Materials, Shandong University, Jinan 250100, China

<sup>2</sup> National Engineering Research Center for Colloidal Materials & Key Laboratory of Special Functional Aggregated Materials, Ministry of Education, Shandong Key Laboratory of Advanced Organosilicon Materials and Technologies, School of Chemistry and Chemical Engineering, Shandong University, Jinan 250100, China

\* Correspondence: dxwang@sdu.edu.cn

### Contents

**Figure S1.** <sup>29</sup>Si NMR spectra of the reaction mixture after 6 h (TBAF, 10mol%)

**Figure S2.** (a) FT-IR spectra of functionalized disiloxane E<sub>1</sub>T<sub>1</sub>; (b) <sup>1</sup>H NMR spectrum of E<sub>1</sub>T<sub>1</sub>; (c) <sup>29</sup>Si NMR spectrum of E<sub>1</sub>T<sub>1</sub>; (d) <sup>13</sup>C NMR spectrum of E<sub>1</sub>T<sub>1</sub>.

**Figure S3.** (a) FT-IR spectra of functionalized disiloxane E<sub>1</sub>T<sub>2</sub>; (b) <sup>1</sup>H NMR spectrum of E<sub>1</sub>T<sub>2</sub>; (c) <sup>29</sup>Si NMR spectrum of E<sub>1</sub>T<sub>2</sub>; (d) <sup>13</sup>C NMR spectrum of E<sub>1</sub>T<sub>2</sub>.

**Figure S4.** (a) FT-IR spectra of functionalized disiloxane E<sub>1</sub>T<sub>3</sub>; (b) <sup>1</sup>H NMR spectrum of E<sub>1</sub>T<sub>3</sub>; (c) <sup>29</sup>Si NMR spectrum of E<sub>1</sub>T<sub>3</sub>; (d) <sup>13</sup>C NMR spectrum of E<sub>1</sub>T<sub>3</sub>.

**Figure S5.** (a) FT-IR spectra of functionalized disiloxane E<sub>1</sub>T<sub>4</sub>; (b) <sup>1</sup>H NMR spectrum of E<sub>1</sub>T<sub>4</sub>; (c) <sup>29</sup>Si NMR spectrum of E<sub>1</sub>T<sub>4</sub>; (d) <sup>13</sup>C NMR spectrum of E<sub>1</sub>T<sub>4</sub>.

**Figure S6.** (a) FT-IR spectra of functionalized disiloxane E<sub>1</sub>T<sub>5</sub>; (b) <sup>1</sup>H NMR spectrum of E<sub>1</sub>T<sub>5</sub>; (c) <sup>29</sup>Si NMR spectrum of E<sub>1</sub>T<sub>5</sub>; (d) <sup>13</sup>C NMR spectrum of E<sub>1</sub>T<sub>5</sub>.

**Figure S7.** (a) FT-IR spectra of functionalized disiloxane E<sub>1</sub>T<sub>6</sub>; (b) <sup>1</sup>H NMR spectrum of E<sub>1</sub>T<sub>6</sub>; (c) <sup>29</sup>Si NMR spectrum of E<sub>1</sub>T<sub>6</sub>; (d) <sup>13</sup>C NMR spectrum of E<sub>1</sub>T<sub>6</sub>.

**Figure S8.** (a) FT-IR spectra of functionalized disiloxane E<sub>1</sub>T<sub>7</sub>; (b) <sup>1</sup>H NMR spectrum of E<sub>1</sub>T<sub>7</sub>; (c) <sup>29</sup>Si NMR spectrum of E<sub>1</sub>T<sub>7</sub>; (d) <sup>13</sup>C NMR spectrum of E<sub>1</sub>T<sub>7</sub>.

**Figure S9.** (a) FT-IR spectra of functionalized disiloxane E<sub>1</sub>T<sub>8</sub>; (b) <sup>1</sup>H NMR spectrum of E<sub>1</sub>T<sub>8</sub>; (c) <sup>29</sup>Si NMR spectrum of E<sub>1</sub>T<sub>8</sub>; (d) <sup>13</sup>C NMR spectrum of E<sub>1</sub>T<sub>8</sub>.

**Figure S10.** (a) FT-IR spectra of functionalized disiloxane E<sub>1</sub>T<sub>9</sub>; (b) <sup>1</sup>H NMR spectrum of E<sub>1</sub>T<sub>9</sub>; (c) <sup>29</sup>Si NMR spectrum of E<sub>1</sub>T<sub>9</sub>; (d) <sup>13</sup>C NMR spectrum of E<sub>1</sub>T<sub>9</sub>.

**Figure S11.** (a) FT-IR spectra of functionalized disiloxane E<sub>1</sub>T<sub>10</sub>; (b) <sup>1</sup>H NMR spectrum of E<sub>1</sub>T<sub>10</sub>; (c) <sup>29</sup>Si NMR spectrum of E<sub>1</sub>T<sub>10</sub>; (d) <sup>13</sup>C NMR spectrum of E<sub>1</sub>T<sub>10</sub>.

**Figure S12.** (a) FT-IR spectra of functionalized disiloxane E<sub>1</sub>T<sub>11</sub>; (b) <sup>1</sup>H NMR spectrum of E<sub>1</sub>T<sub>11</sub>; (c) <sup>29</sup>Si NMR spectrum of E<sub>1</sub>T<sub>11</sub>; (d) <sup>13</sup>C NMR spectrum of E<sub>1</sub>T<sub>11</sub>.

**Figure S13.** (a) FT-IR spectra of functionalized disiloxane E<sub>2</sub>T<sub>6</sub>; (b) <sup>1</sup>H NMR spectrum of E<sub>2</sub>T<sub>6</sub>; (c) <sup>13</sup>C NMR spectrum of E<sub>2</sub>T<sub>6</sub>.

**Figure S14.** HR-MS spectra of functionalized disiloxane E<sub>1</sub>T<sub>1</sub> and E<sub>1</sub>T<sub>2</sub>

**Figure S15.** HR-MS spectra of functionalized disiloxane E<sub>1</sub>T<sub>3</sub> and E<sub>1</sub>T<sub>4</sub>

**Figure S16.** HR-MS spectra of functionalized disiloxane E<sub>1</sub>T<sub>5</sub> and E<sub>1</sub>T<sub>6</sub>

**Figure S17.** HR-MS spectra of functionalized disiloxane E<sub>1</sub>T<sub>7</sub> and E<sub>1</sub>T<sub>8</sub>

**Figure S18.** HR-MS spectra of functionalized disiloxane E<sub>1</sub>T<sub>9</sub> and E<sub>1</sub>T<sub>10</sub>

**Figure S19.** HR-MS spectra of functionalized disiloxane E<sub>1</sub>T<sub>11</sub>

**Figure S20.** Fluorescence emission spectra of E<sub>1</sub>T<sub>1</sub> (a), E<sub>1</sub>T<sub>2</sub> (b), E<sub>1</sub>T<sub>3</sub> (c) and E<sub>1</sub>T<sub>4</sub> (d) with different concentration excited at 365 nm

**Figure S21.** Fluorescence emission spectra of E<sub>1</sub>T<sub>5</sub> (a), E<sub>1</sub>T<sub>6</sub> (b), E<sub>1</sub>T<sub>7</sub> (c) and E<sub>1</sub>T<sub>8</sub> (d) with different concentration excited at 365 nm

**Figure S22.** Fluorescence emission spectra of E<sub>1</sub>T<sub>9</sub> (a), E<sub>1</sub>T<sub>10</sub> (b), and E<sub>1</sub>T<sub>11</sub> (c) with different concentration excited at 365 nm

**Figure S23.** Fluorescence emission spectra of E<sub>1</sub>T<sub>1</sub> (a), E<sub>1</sub>T<sub>2</sub> (b), E<sub>1</sub>T<sub>3</sub> (c), and E<sub>1</sub>T<sub>4</sub> (d) in different solvents excited at 365 nm

**Figure S24.** Fluorescence emission spectra of E<sub>1</sub>T<sub>5</sub> (a), E<sub>1</sub>T<sub>6</sub> (b), E<sub>1</sub>T<sub>7</sub> (c), and E<sub>1</sub>T<sub>8</sub> (d) in different solvents excited at 365 nm

**Figure S25.** Fluorescence emission spectra of E<sub>1</sub>T<sub>9</sub> (a), E<sub>1</sub>T<sub>10</sub> (b), and E<sub>1</sub>T<sub>11</sub> (c) in different solvents excited at 365 nm

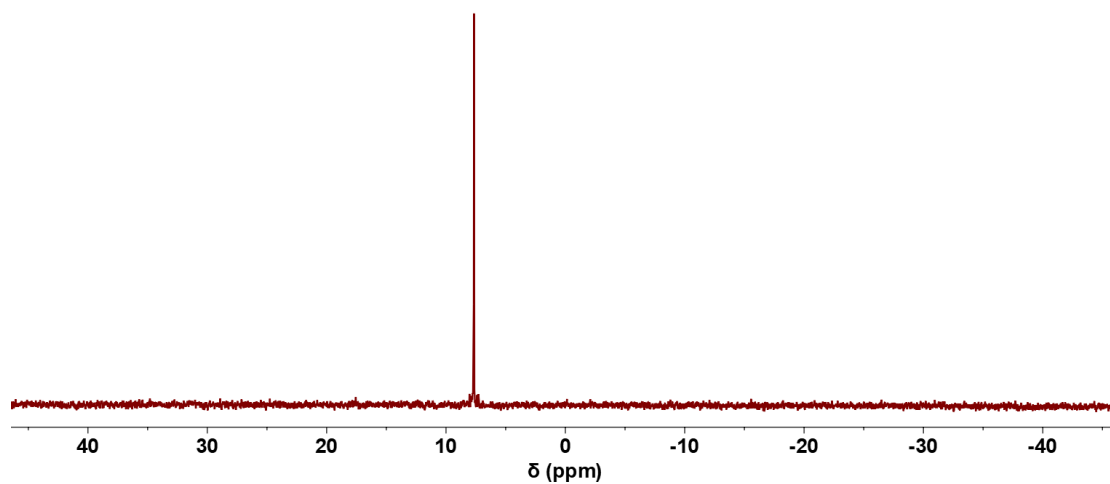

**Figure S1.**  $^{29}\text{Si}$  NMR spectra of the reaction mixture after 6 h (TBAF, 10mol%)

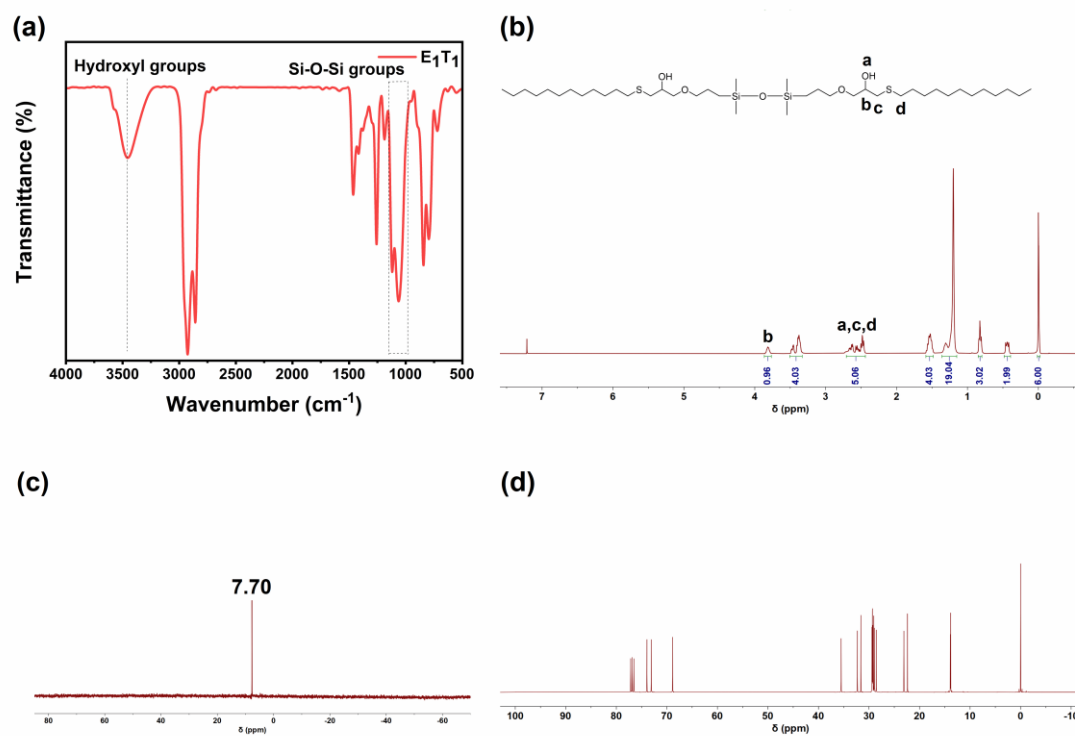

**Figure S2.** (a) FT-IR spectra of functionalized disiloxane  $\text{E}_1\text{T}_1$ ; (b)  $^1\text{H}$  NMR spectrum of  $\text{E}_1\text{T}_1$ ; (c)  $^{29}\text{Si}$  NMR spectrum of  $\text{E}_1\text{T}_1$ ; (d)  $^{13}\text{C}$  NMR spectrum of  $\text{E}_1\text{T}_1$ .

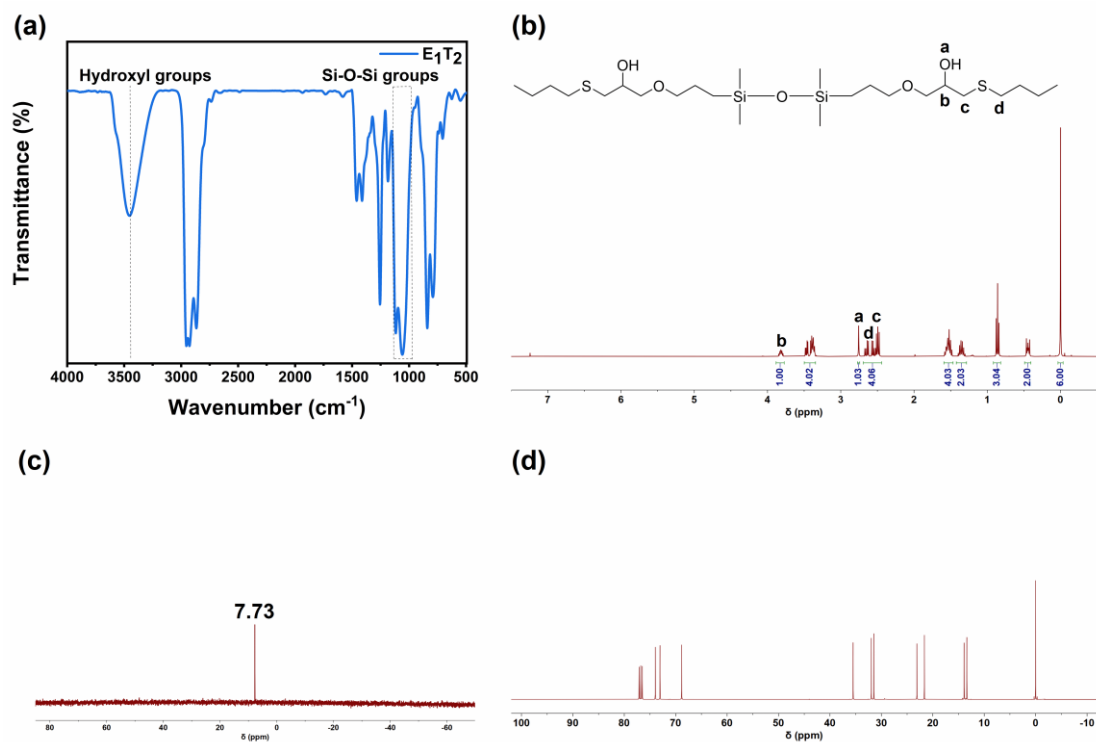

**Figure S3.** (a) FT-IR spectra of functionalized disiloxane E<sub>1</sub>T<sub>2</sub>; (b) <sup>1</sup>H NMR spectrum of E<sub>1</sub>T<sub>2</sub>; (c) <sup>29</sup>Si NMR spectrum of E<sub>1</sub>T<sub>2</sub>; (d) <sup>13</sup>C NMR spectrum of E<sub>1</sub>T<sub>2</sub>.

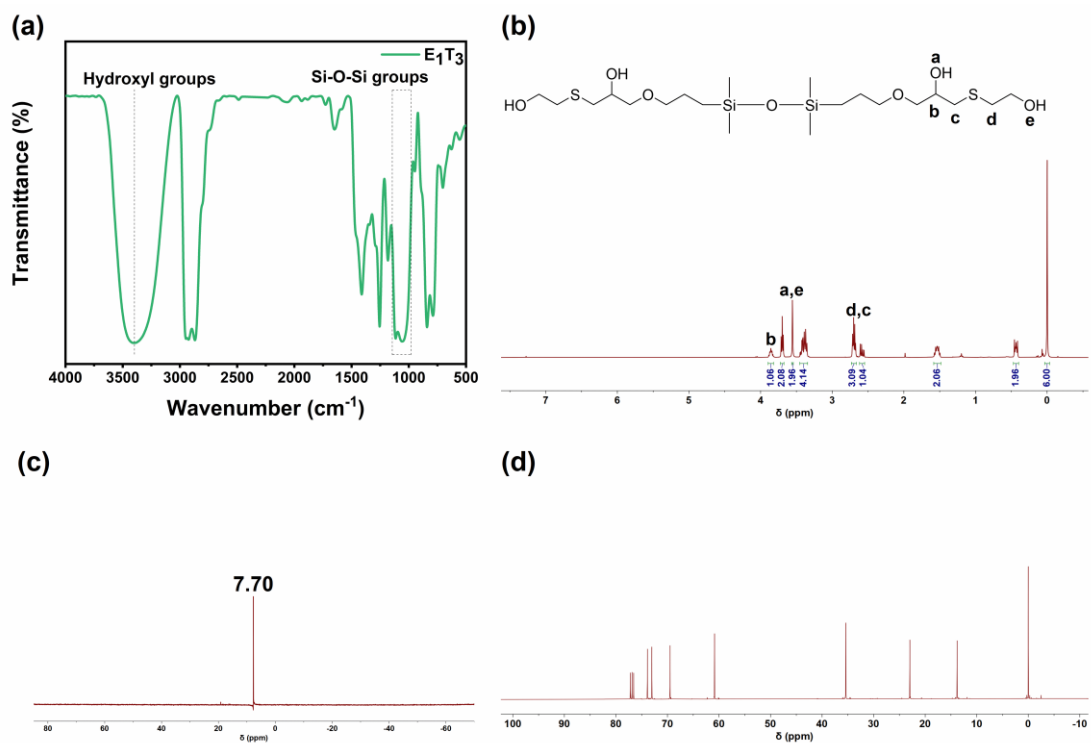

**Figure S4.** (a) FT-IR spectra of functionalized disiloxane E<sub>1</sub>T<sub>3</sub>; (b) <sup>1</sup>H NMR spectrum of E<sub>1</sub>T<sub>3</sub>; (c) <sup>29</sup>Si NMR spectrum of E<sub>1</sub>T<sub>3</sub>; (d) <sup>13</sup>C NMR spectrum of E<sub>1</sub>T<sub>3</sub>.

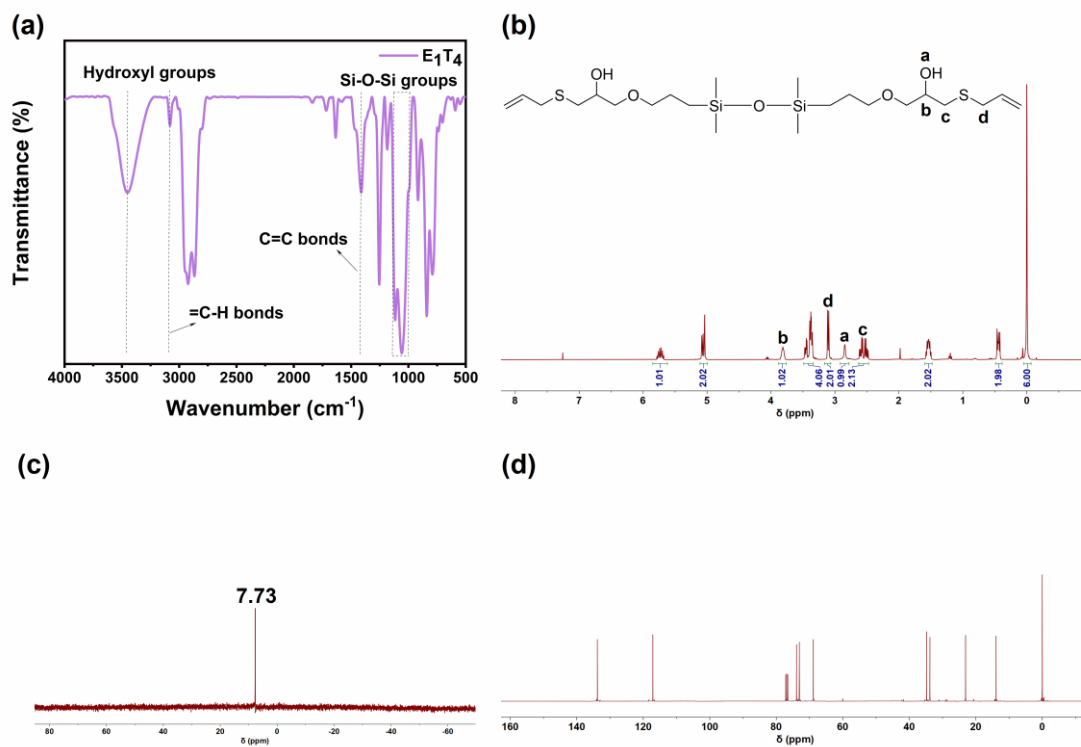

**Figure S5.** (a) FT-IR spectra of functionalized disiloxane E<sub>1</sub>T<sub>4</sub>; (b) <sup>1</sup>H NMR spectrum of E<sub>1</sub>T<sub>4</sub>; (c) <sup>29</sup>Si NMR spectrum of E<sub>1</sub>T<sub>4</sub>; (d) <sup>13</sup>C NMR spectrum of E<sub>1</sub>T<sub>4</sub>.

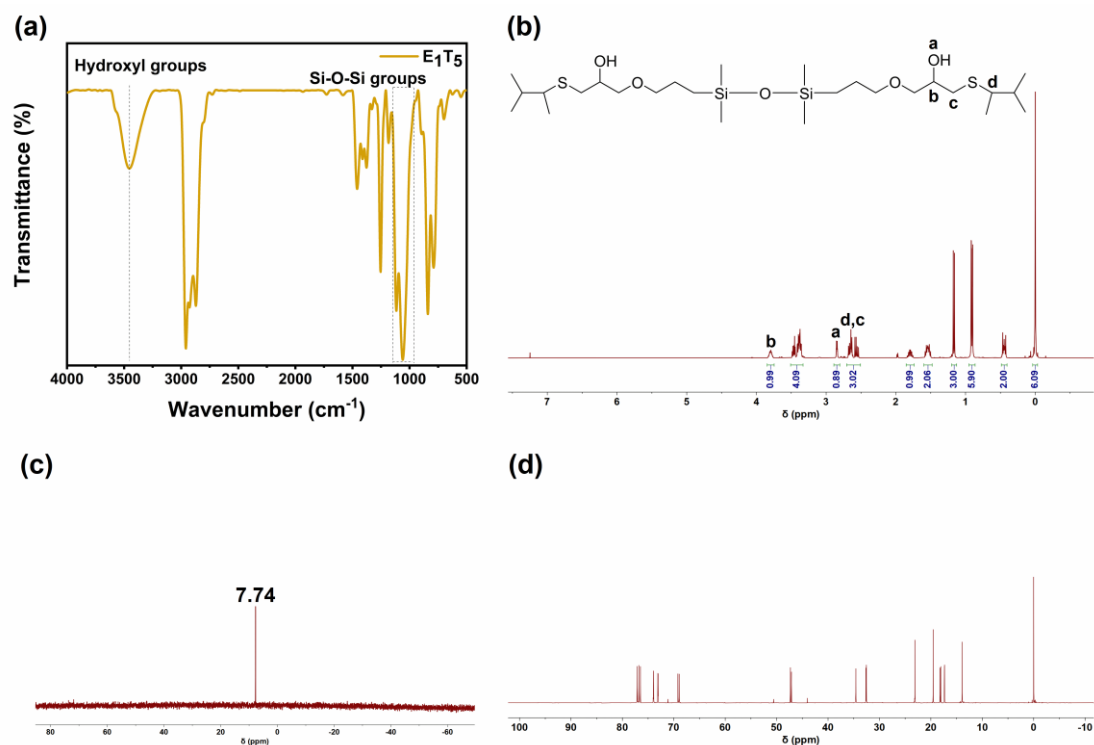

**Figure S6.** (a) FT-IR spectra of functionalized disiloxane E<sub>1</sub>T<sub>5</sub>; (b) <sup>1</sup>H NMR spectrum of E<sub>1</sub>T<sub>5</sub>; (c) <sup>29</sup>Si NMR spectrum of E<sub>1</sub>T<sub>5</sub>; (d) <sup>13</sup>C NMR spectrum of E<sub>1</sub>T<sub>5</sub>.

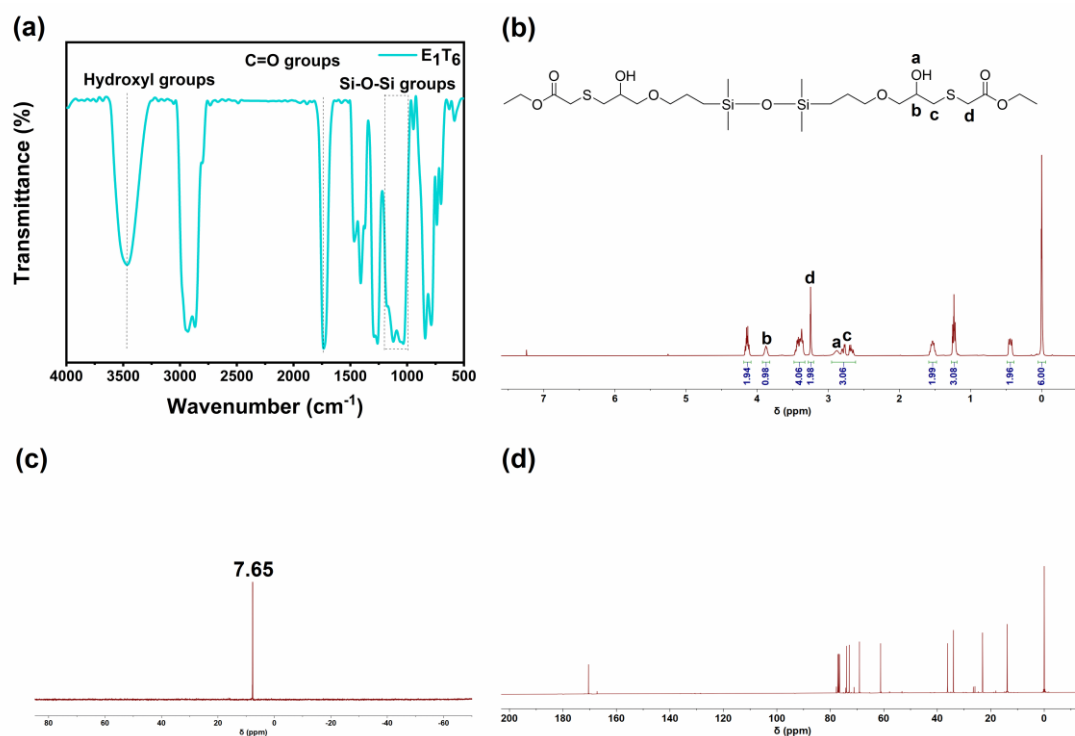

**Figure S7.** (a) FT-IR spectra of functionalized disiloxane  $E_1T_6$ ; (b)  $^1H$  NMR spectrum of  $E_1T_6$ ; (c)  $^{29}Si$  NMR spectrum of  $E_1T_6$ ; (d)  $^{13}C$  NMR spectrum of  $E_1T_6$ .

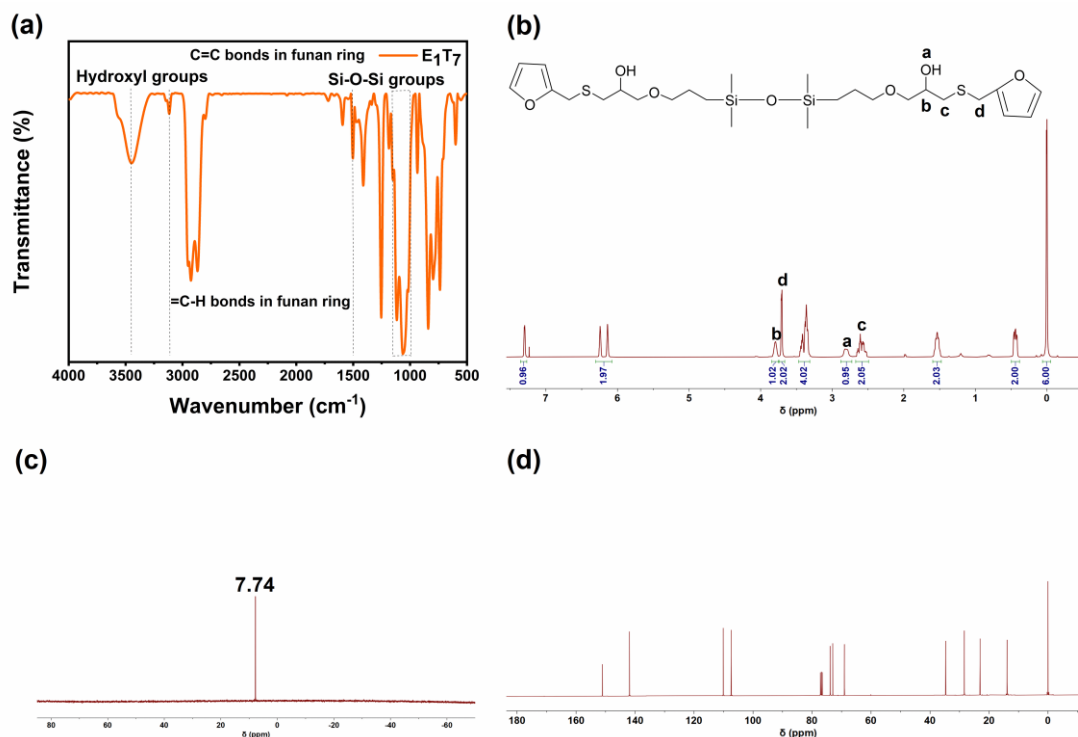

**Figure S8.** (a) FT-IR spectra of functionalized disiloxane  $E_1T_7$ ; (b)  $^1H$  NMR spectrum of  $E_1T_7$ ; (c)  $^{29}Si$  NMR spectrum of  $E_1T_7$ ; (d)  $^{13}C$  NMR spectrum of  $E_1T_7$ .

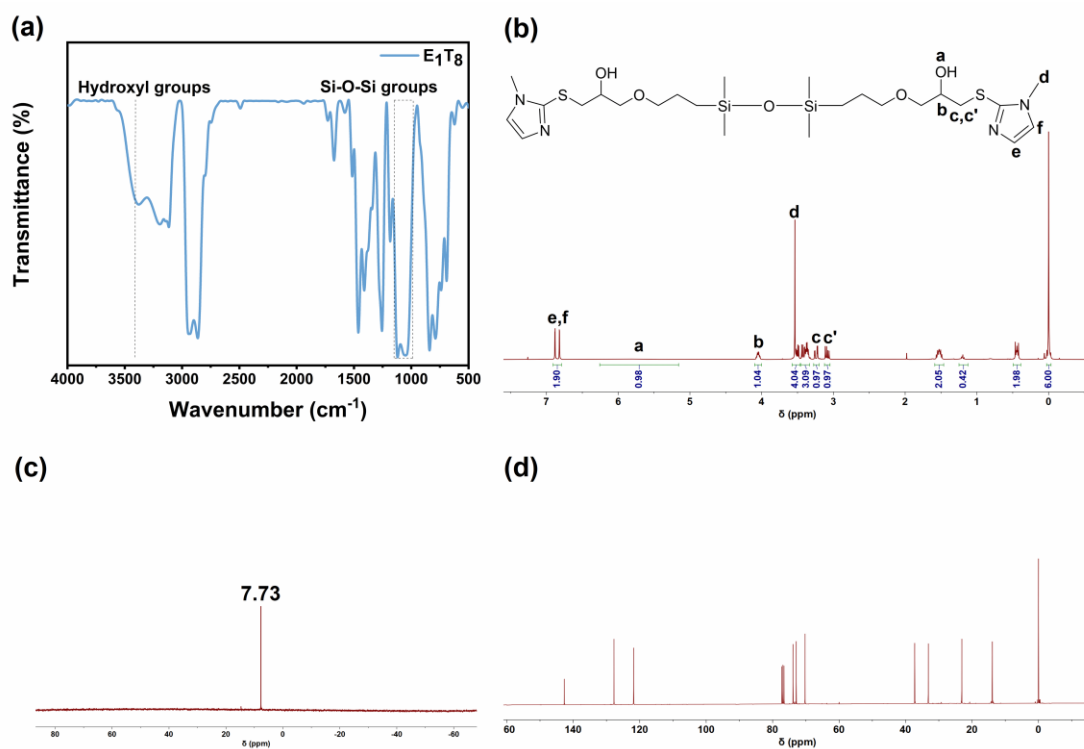

**Figure S9.** (a) FT-IR spectra of functionalized disiloxane E<sub>1</sub>T<sub>8</sub>; (b) <sup>1</sup>H NMR spectrum of E<sub>1</sub>T<sub>8</sub>; (c) <sup>29</sup>Si NMR spectrum of E<sub>1</sub>T<sub>8</sub>; (d) <sup>13</sup>C NMR spectrum of E<sub>1</sub>T<sub>8</sub>.

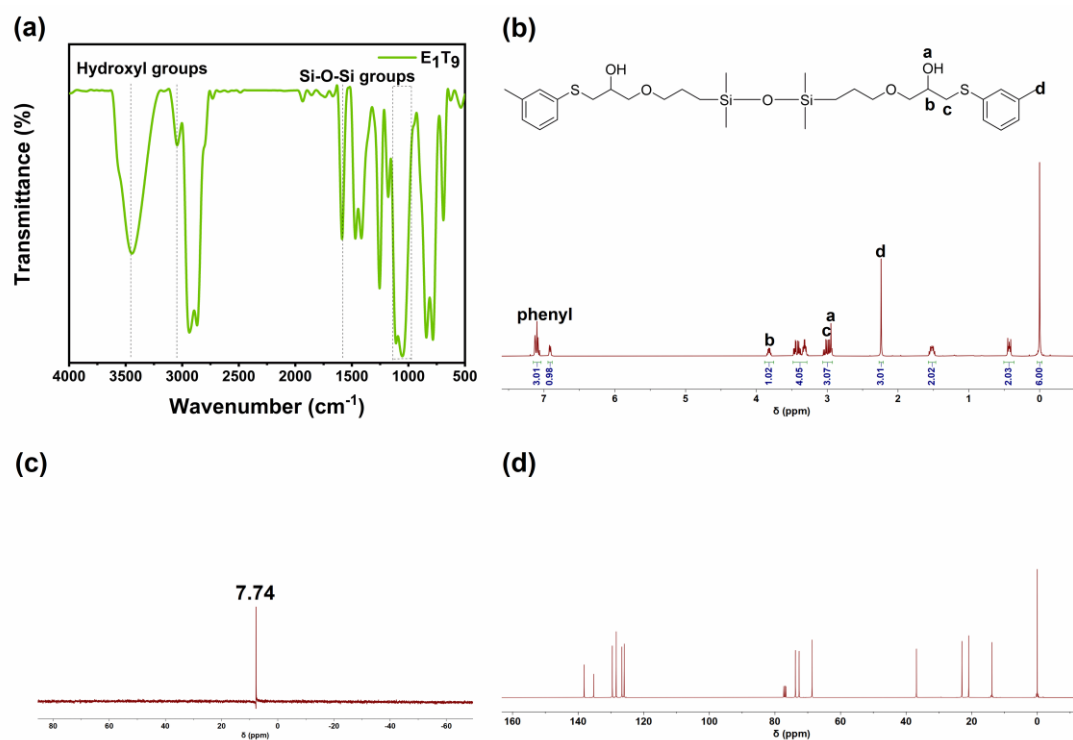

**Figure S10.** (a) FT-IR spectra of functionalized disiloxane E<sub>1</sub>T<sub>9</sub>; (b) <sup>1</sup>H NMR spectrum of E<sub>1</sub>T<sub>9</sub>; (c) <sup>29</sup>Si NMR spectrum of E<sub>1</sub>T<sub>9</sub>; (d) <sup>13</sup>C NMR spectrum of E<sub>1</sub>T<sub>9</sub>.

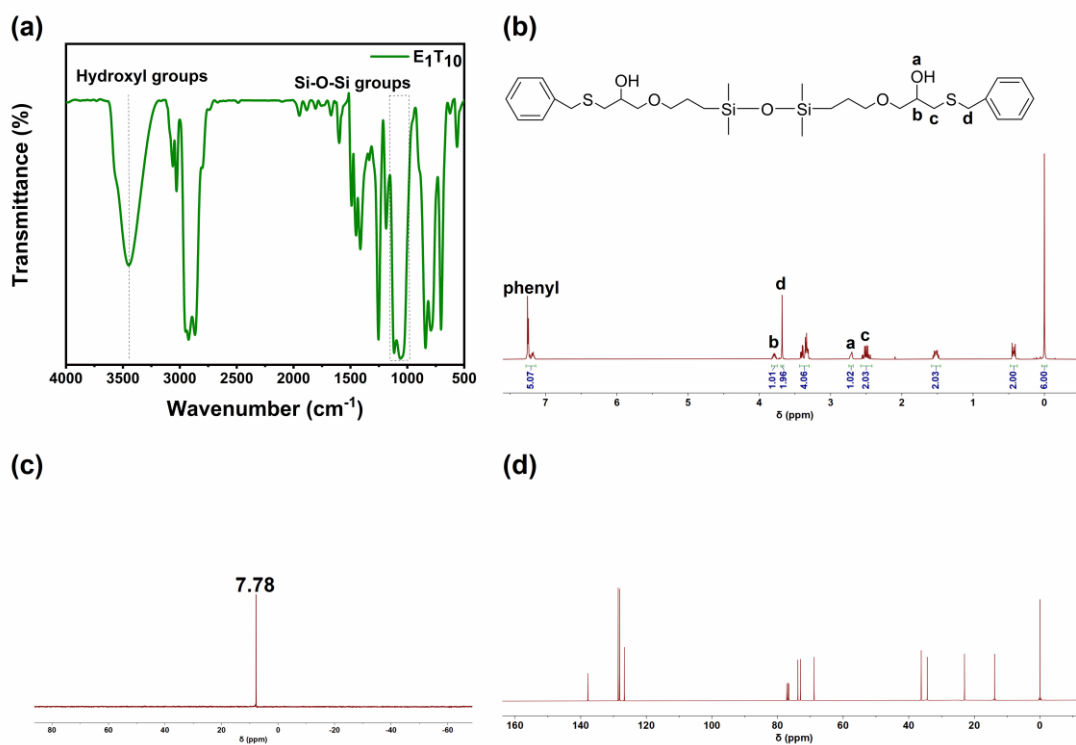

**Figure S11.** (a) FT-IR spectra of functionalized disiloxane E<sub>1</sub>T<sub>10</sub>; (b) <sup>1</sup>H NMR spectrum of E<sub>1</sub>T<sub>10</sub>; (c) <sup>29</sup>Si NMR spectrum of E<sub>1</sub>T<sub>10</sub>; (d) <sup>13</sup>C NMR spectrum of E<sub>1</sub>T<sub>10</sub>.

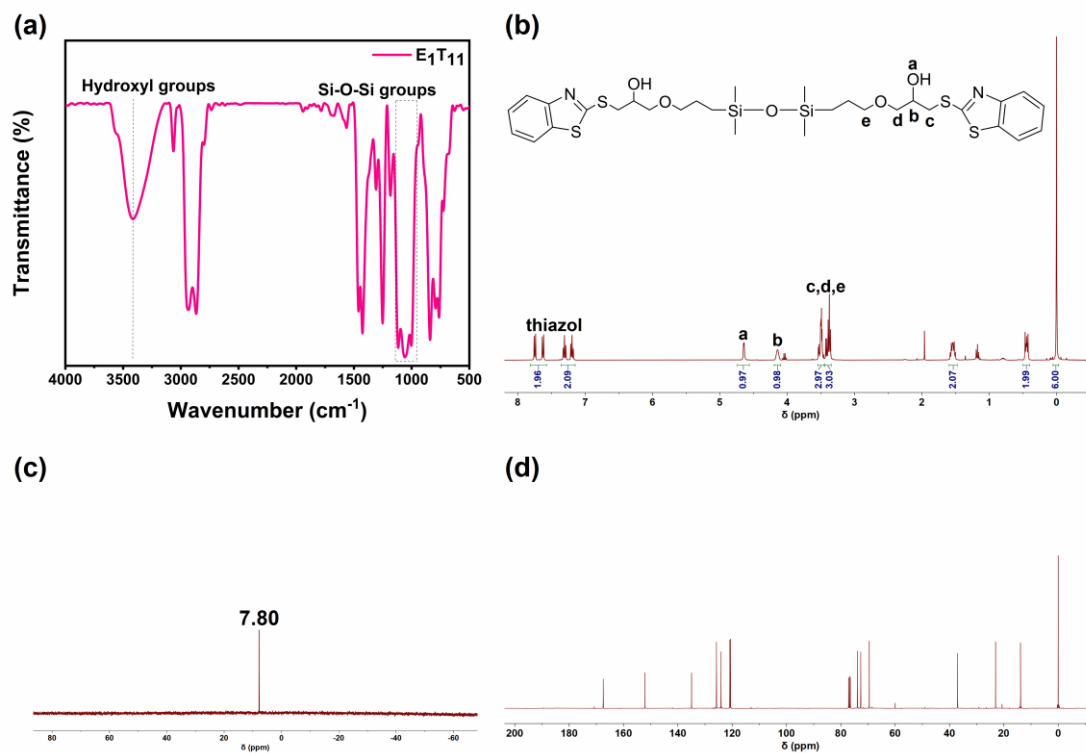

**Figure S12.** (a) FT-IR spectra of functionalized disiloxane E<sub>1</sub>T<sub>11</sub>; (b) <sup>1</sup>H NMR spectrum of E<sub>1</sub>T<sub>11</sub>; (c) <sup>29</sup>Si NMR spectrum of E<sub>1</sub>T<sub>11</sub>; (d) <sup>13</sup>C NMR spectrum of E<sub>1</sub>T<sub>11</sub>.



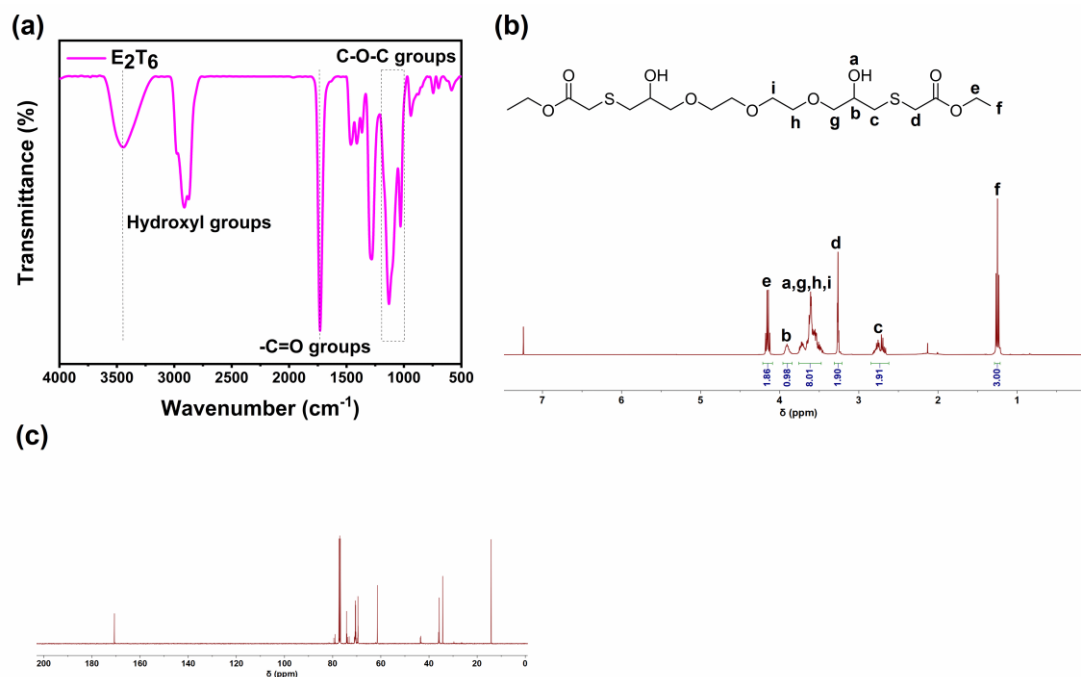

**Figure S13.** (a) FT-IR spectra of functionalized disiloxane E<sub>2</sub>T<sub>6</sub>; (b) <sup>1</sup>H NMR spectrum of E<sub>2</sub>T<sub>6</sub>; (c) <sup>13</sup>C NMR spectrum of E<sub>2</sub>T<sub>6</sub>.

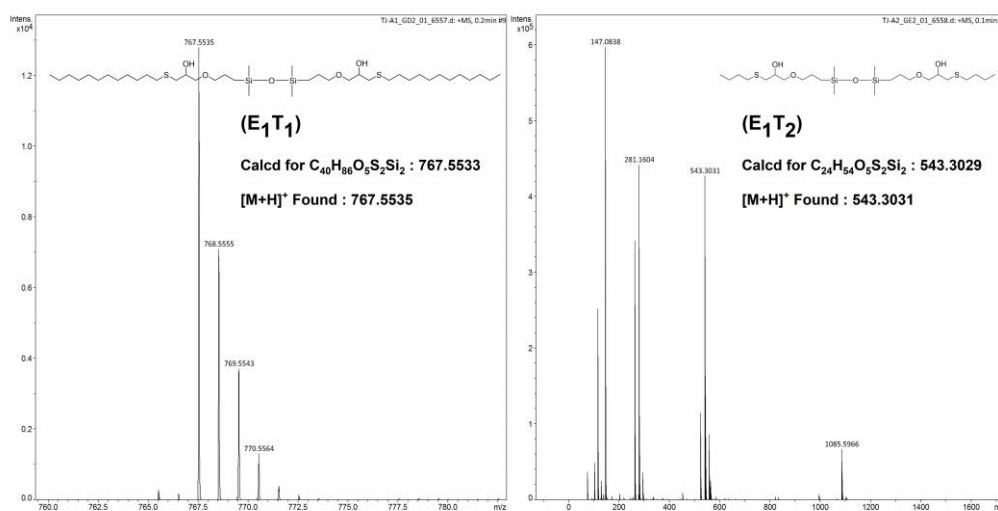

**Figure S14.** HR-MS spectra of functionalized disiloxane E<sub>1</sub>T<sub>1</sub> and E<sub>1</sub>T<sub>2</sub>

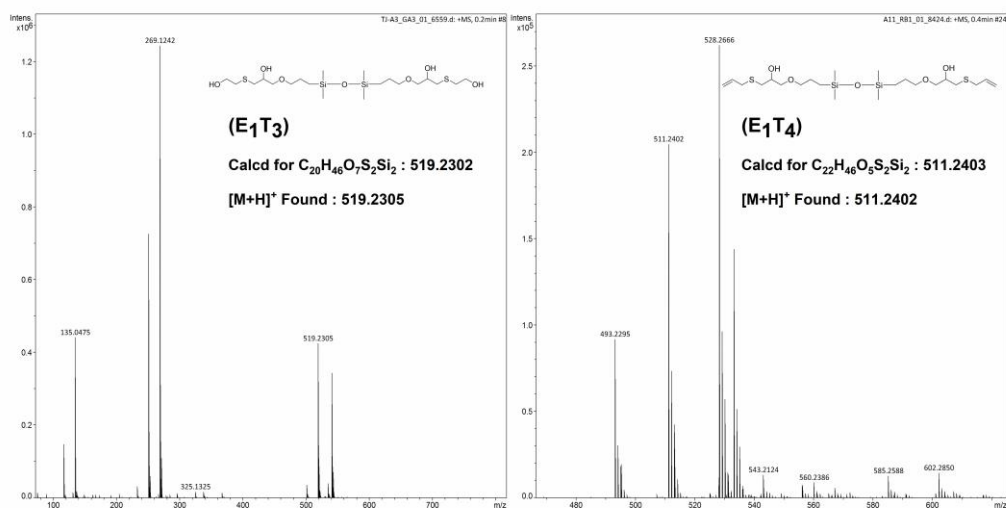

**Figure S15.** HR-MS spectra of functionalized disiloxane E<sub>1</sub>T<sub>3</sub> and E<sub>1</sub>T<sub>4</sub>.

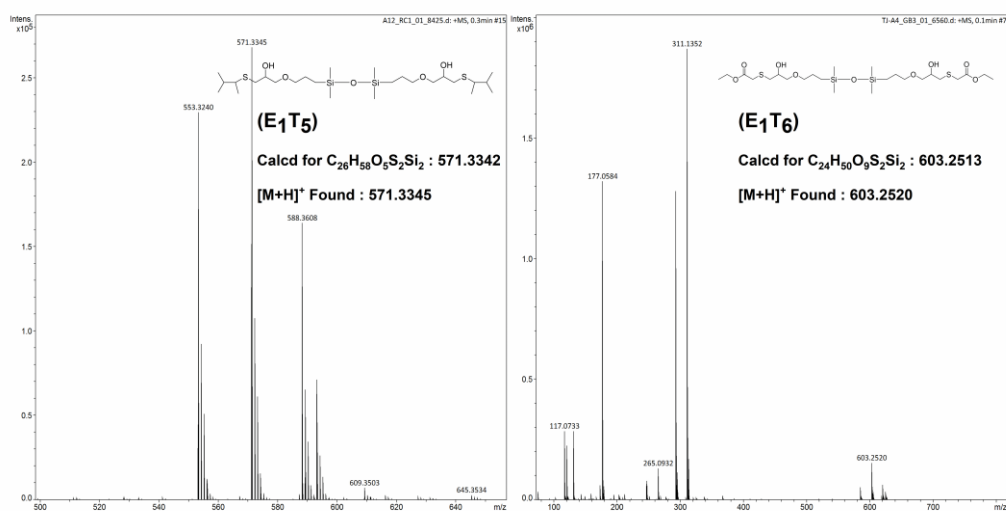

**Figure S16.** HR-MS spectra of functionalized disiloxane E<sub>1</sub>T<sub>5</sub> and E<sub>1</sub>T<sub>6</sub>

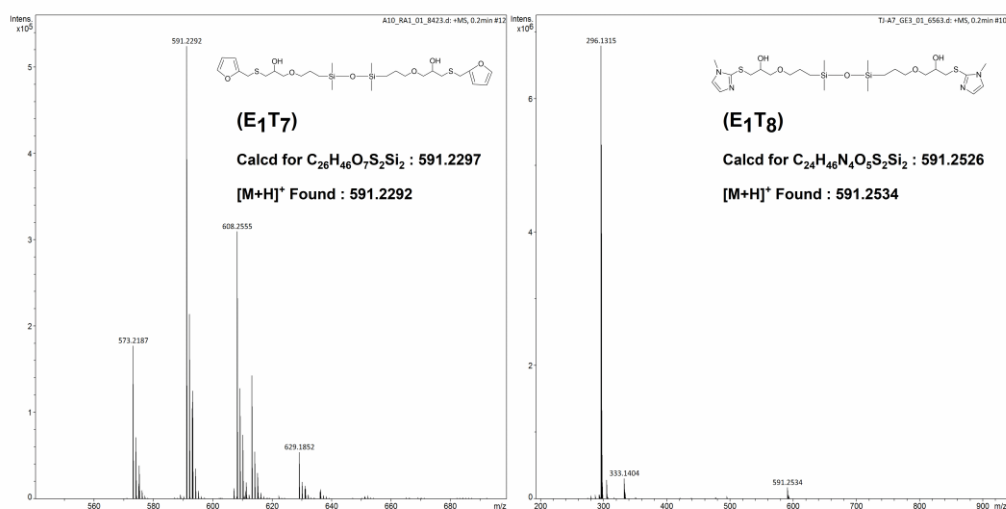

**Figure S17.** HR-MS spectra of functionalized disiloxane E<sub>1</sub>T<sub>7</sub> and E<sub>1</sub>T<sub>8</sub>

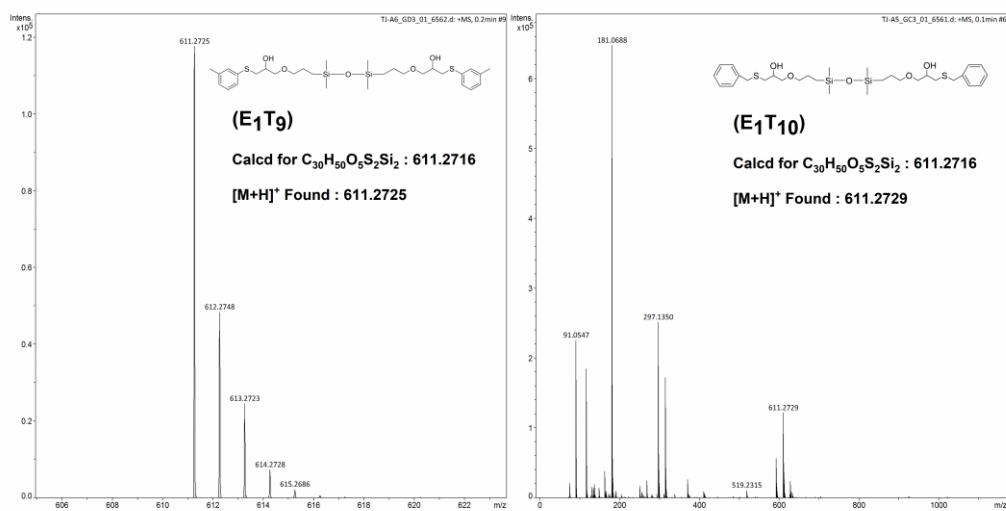

**Figure S18.** HR-MS spectra of functionalized disiloxane E<sub>1</sub>T<sub>9</sub> and E<sub>1</sub>T<sub>10</sub>

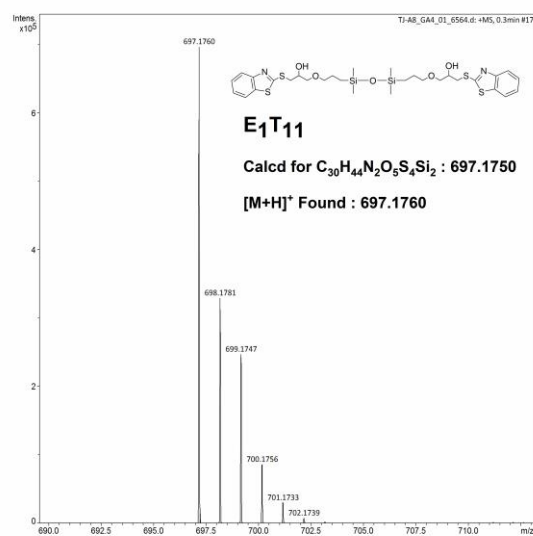

**Figure S19.** HR-MS spectra of functionalized disiloxane E<sub>1</sub>T<sub>11</sub>

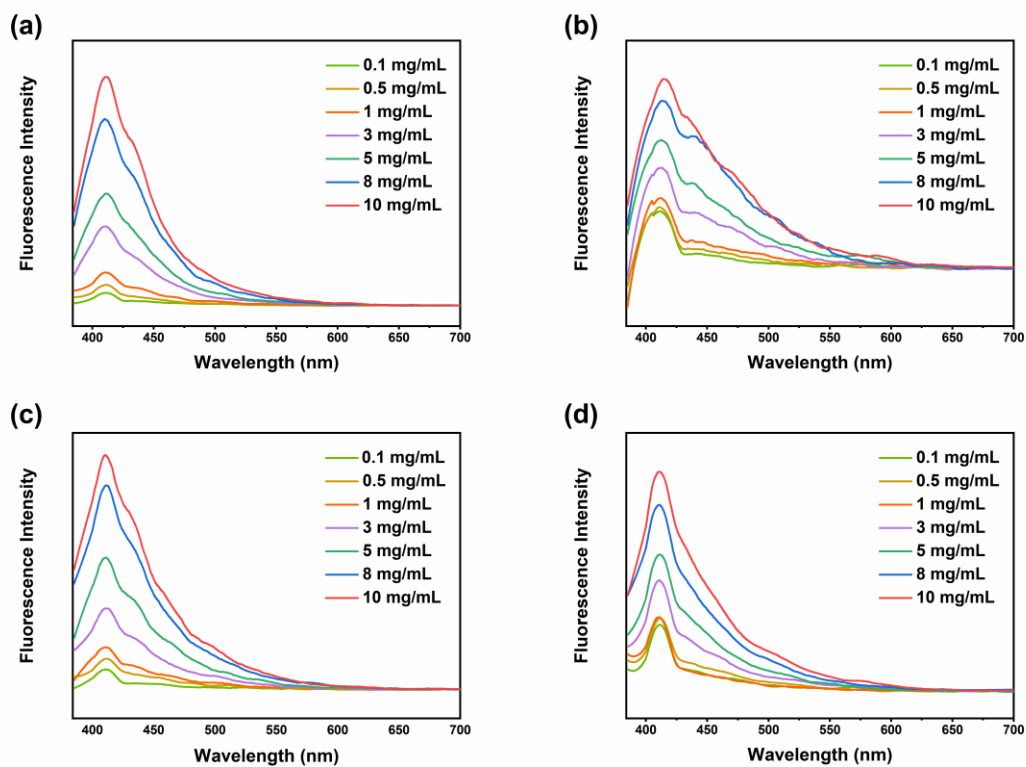

**Figure S20.** Fluorescence emission spectra of E<sub>1</sub>T<sub>1</sub> (a), E<sub>1</sub>T<sub>2</sub> (b), E<sub>1</sub>T<sub>3</sub> (c), and E<sub>1</sub>T<sub>4</sub> (d) with different concentration excited at 365 nm

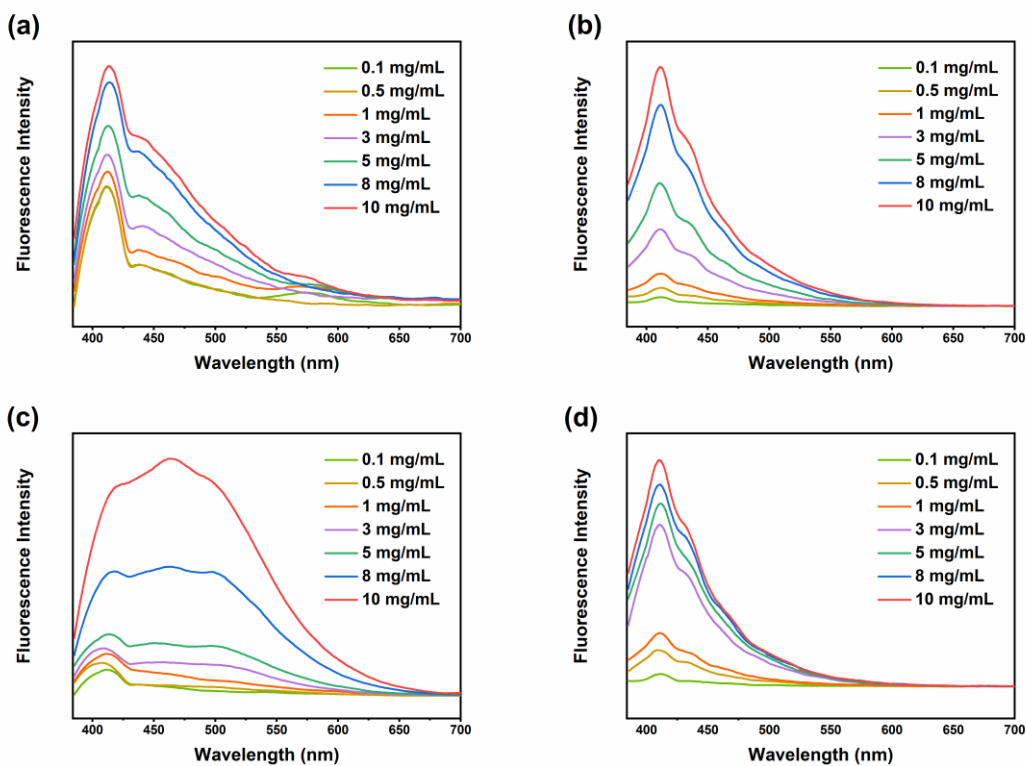

**Figure S21.** Fluorescence emission spectra of E<sub>1</sub>T<sub>5</sub> (a), E<sub>1</sub>T<sub>6</sub> (b), E<sub>1</sub>T<sub>7</sub> (c), and E<sub>1</sub>T<sub>8</sub> (d) with different concentration excited at 365 nm

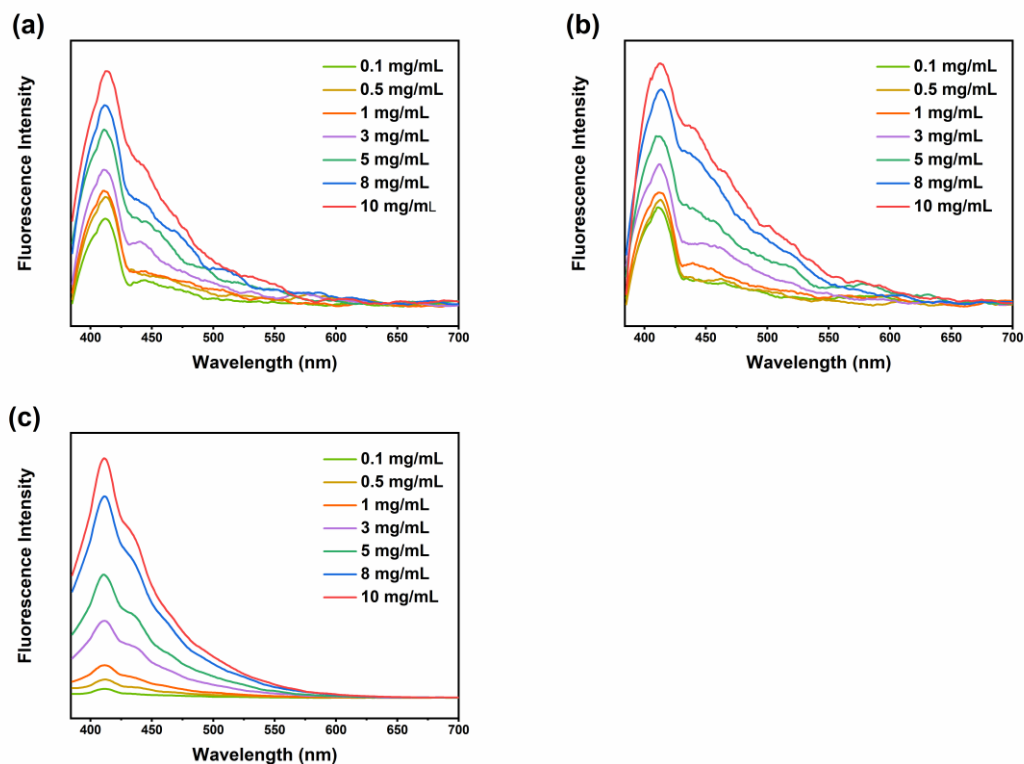

**Figure S22.** Fluorescence emission spectra of  $E_1T_9$  (a),  $E_1T_{10}$  (b), and  $E_1T_{11}$  (c) with different concentration excited at 365 nm

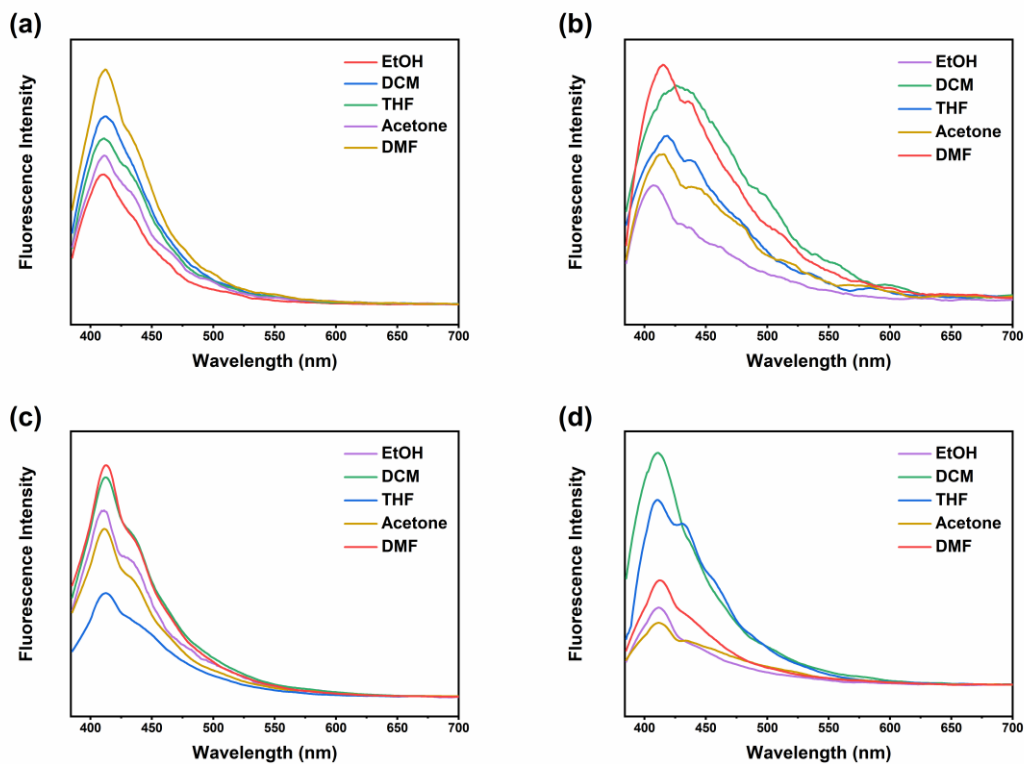

**Figure S23.** Fluorescence emission spectra of  $E_1T_1$  (a),  $E_1T_2$  (b),  $E_1T_3$  (c), and  $E_1T_4$  (d) in different solvents excited at 365 nm

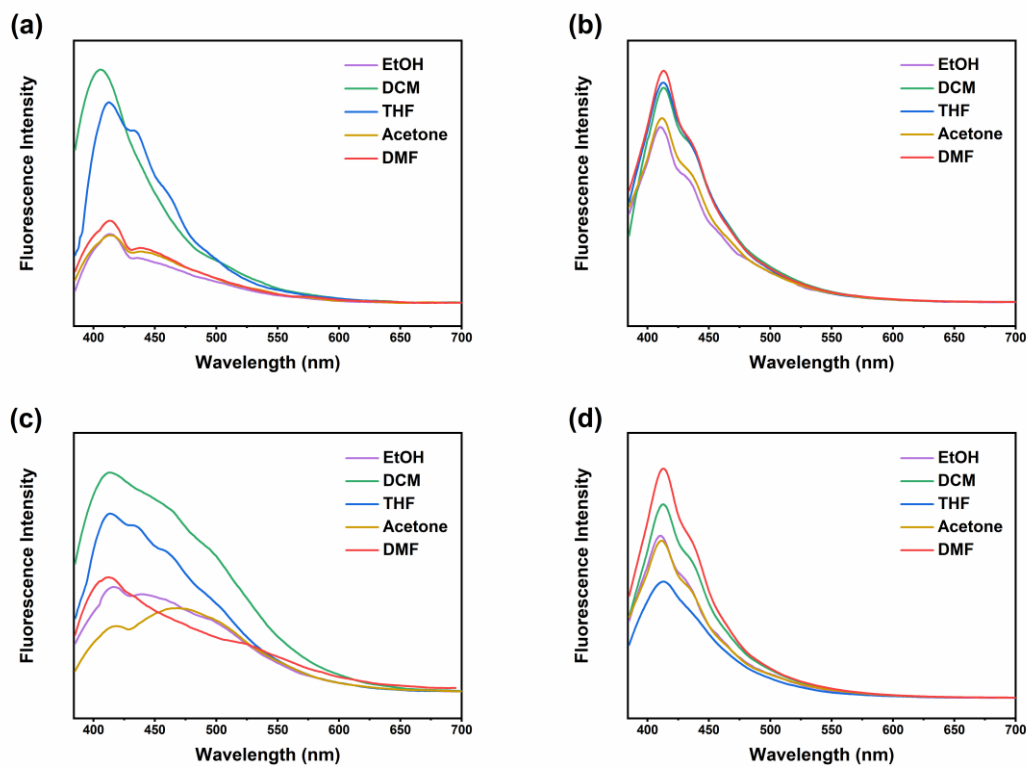

**Figure S24.** Fluorescence emission spectra of  $E_1T_5$  (a),  $E_1T_6$  (b),  $E_1T_7$  (c), and  $E_1T_8$  (d) in different solvents excited at 365 nm

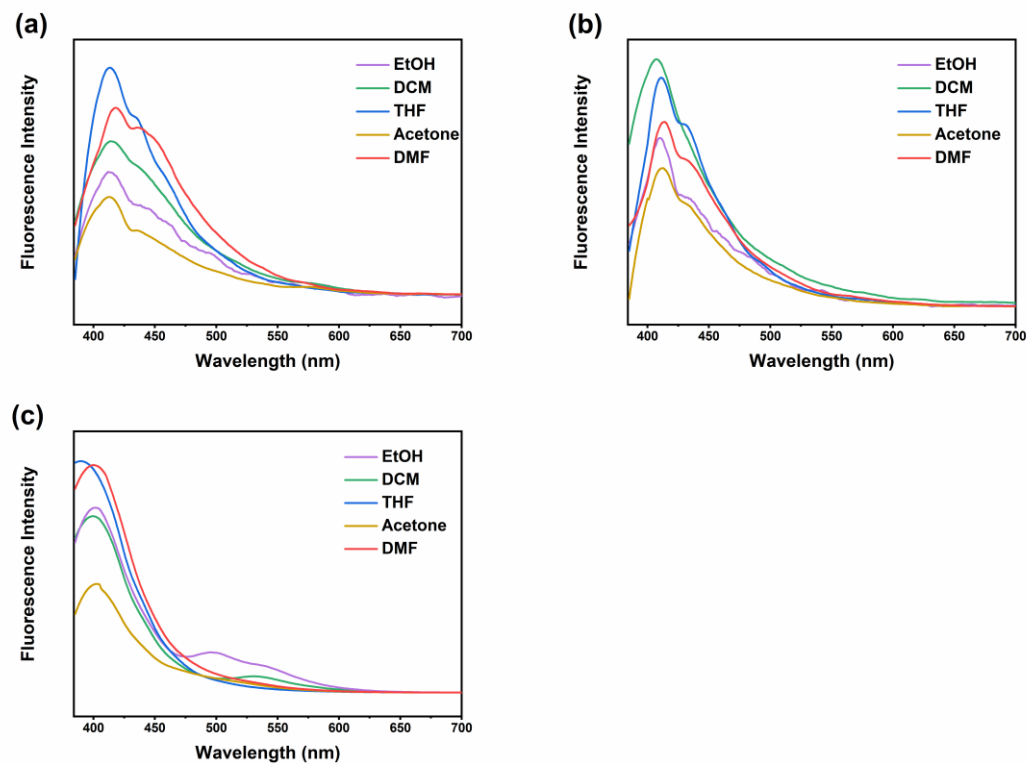

**Figure S25.** Fluorescence emission spectra of  $E_1T_9$  (a),  $E_1T_{10}$  (b), and  $E_1T_{11}$  (c) in different solvents excited at 365 nm
